# Supplementary material
Source: PubMed Central journal article supplement (PMC154324)
Supplement: pnas_0431215100_8.pdf [file pnas_0431215100_8.pdf]

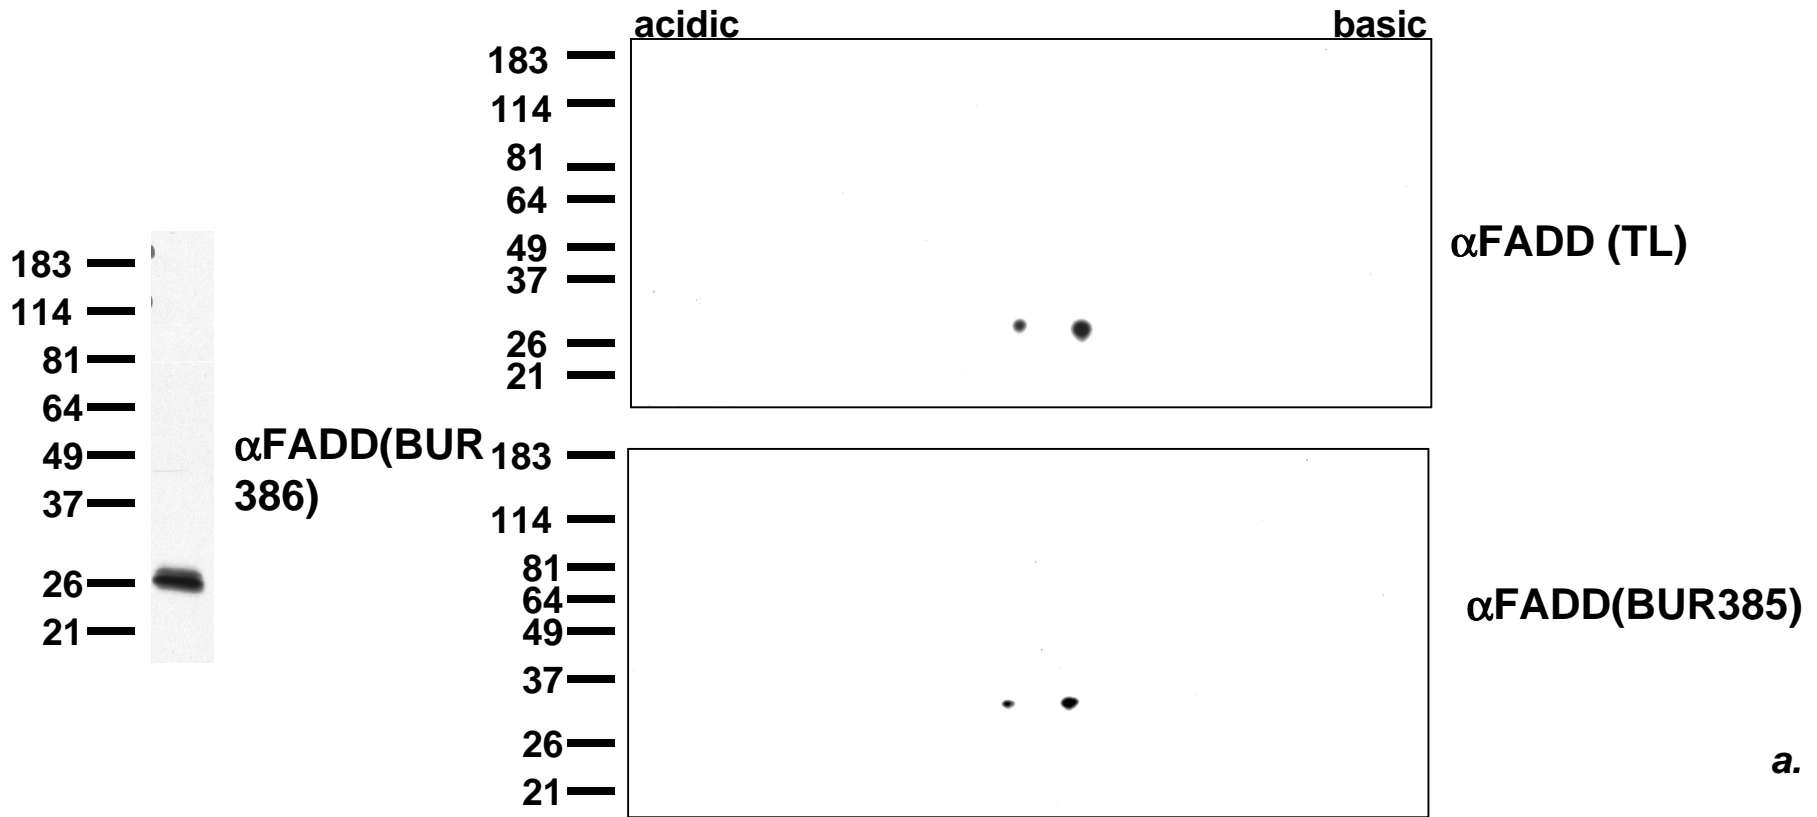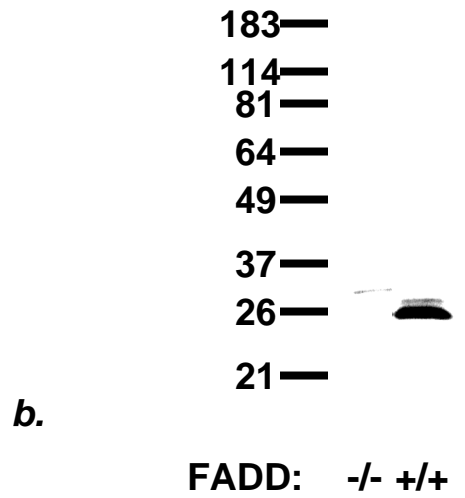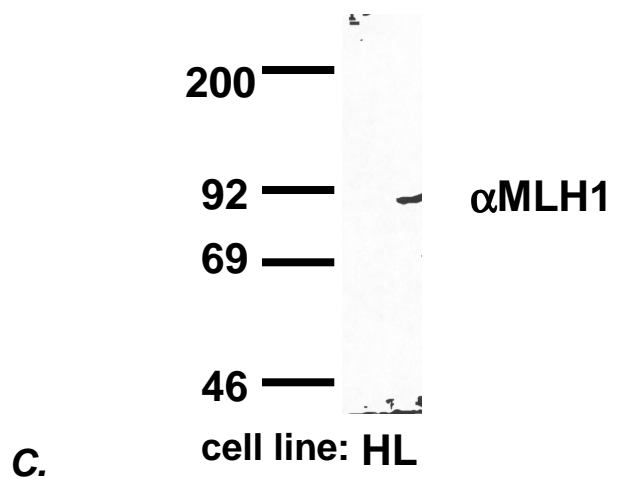

d. Characterization of sheep anti-MBD4 S157 (Data of Huck-Hui Ng and Adrian Bird)

Antigen: GST-hMBD4 aa371-580. This includes the glycosylase domain of MBD4.  
Mouse and human MBD4 are 95.2% identical at the amino acid level over this region.

S157 anti-MBD4 antiserum

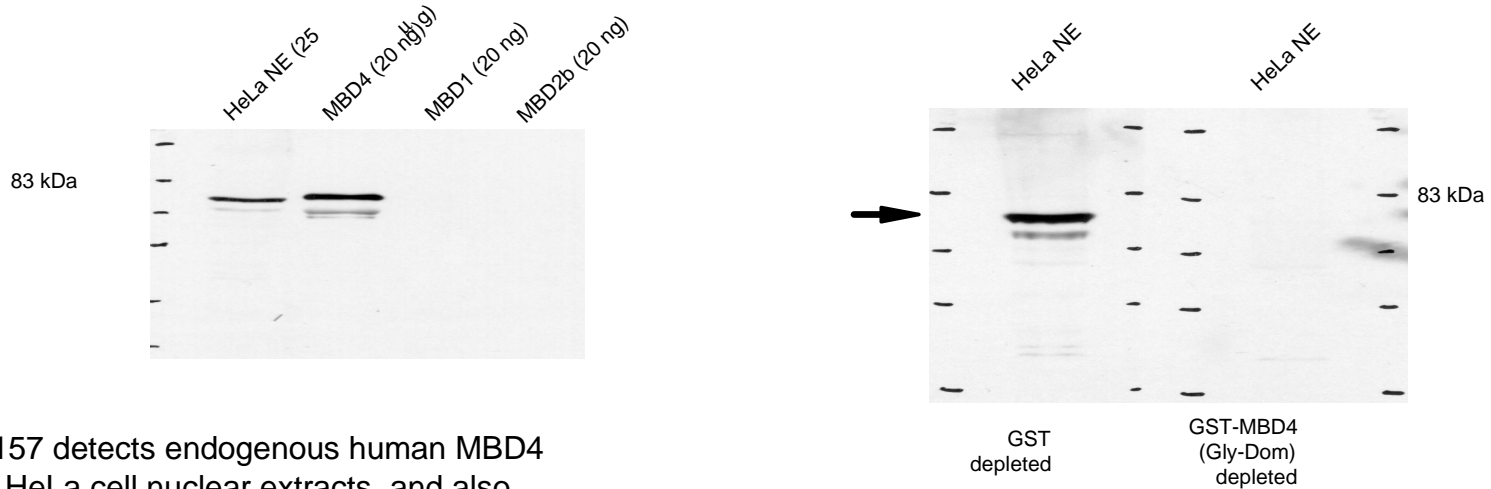

S157 detects endogenous human MBD4  
In HeLa cell nuclear extracts, and also  
recombinant MBD4, but does not cross  
react with MBD1 or MBD2b

S157 depletes the 70kD band HeLa cell  
nuclear extracts whereas antiGST antibodies do not.

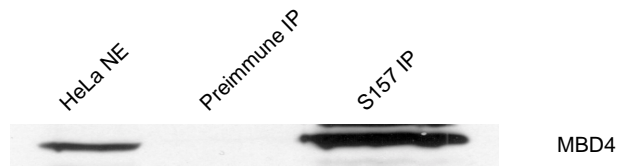

S157 immunoprecipitates from nuclear extracts  
whereas preimmune serum does not.
