# Supplementary material
Source: PubMed Central journal article supplement (PMC154324)

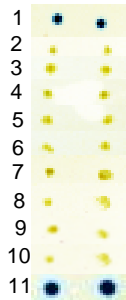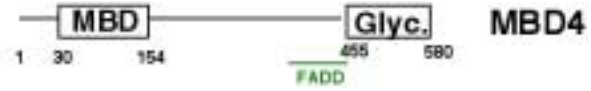

| MBD4 constructs (amino acids included) | LacZ |
|----------------------------------------|------|
| 1-148                                  | -    |
| 149-399                                | -    |
| 400-580                                | ++   |
| 426-580                                | +    |
| 471-580                                | -    |
| 521-580                                | -    |
| 556-580                                | -    |
| 455-580*                               | -    |
| 400-455*                               | ++   |
| 400-430*                               | +    |
| 400-580*                               | ++   |
| 1-580                                  | ++   |

**a.**

**b.**

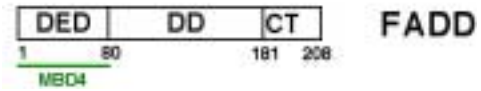

| FADD domains included | LacZ |
|-----------------------|------|
| 1-208                 | ++   |
| 1-192                 | ++   |
| 1-183                 | ++   |
| 81-208                | -    |
| 181-208               | -    |

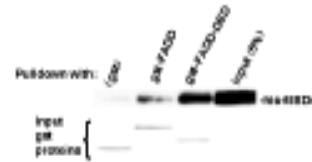

**c.**

Supplement: pnas_0431215100_11.pdf [file pnas_0431215100_11.pdf]

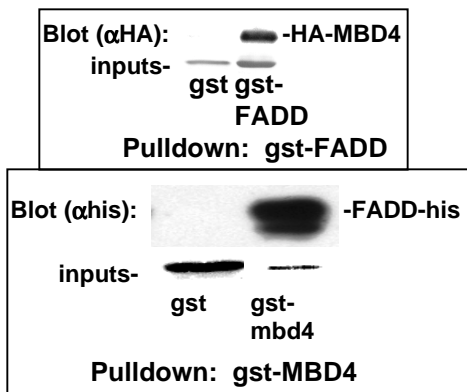

***a.***

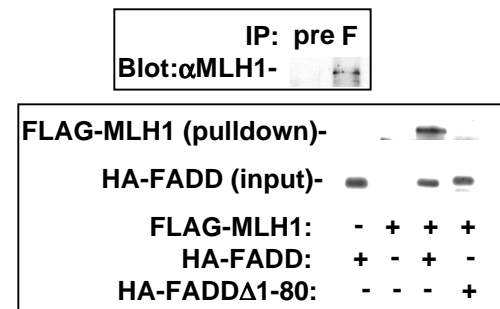

***b.***

Supplement: pnas_0431215100_12.pdf [file pnas_0431215100_12.pdf]

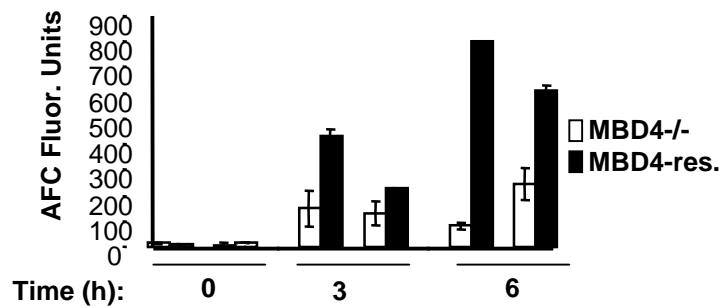

***a.***

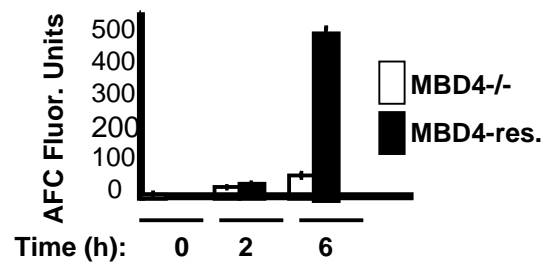

***b.***

Supplement: pnas_0431215100_13.pdf [file pnas_0431215100_13.pdf]

**a**

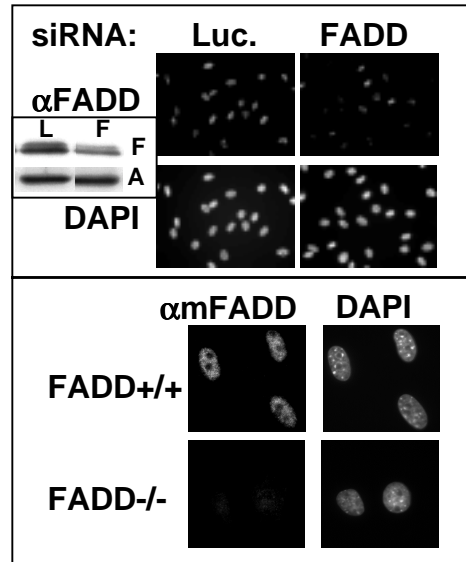

**b**

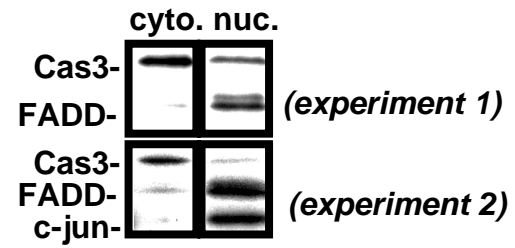

Supplement: pnas_0431215100_9.pdf [file pnas_0431215100_9.pdf]
